# Supplementary material for: Calibrating Agro-Hydrological Model under Grazing Activities and Its Challenges and Implications
Source: MDPI journal article supplement (doi:10.3390/hydrology11040042), 2024-03-22
Supplement: s1 [file s1]

Type of the Paper (Article, Review, Communication, etc.)

# Calibrating Agro-Hydrological Model under Grazing Activities and its Challenges and Implications.

Amanda M. Nelson <sup>1,\*</sup>, Mahesh L. Maskey <sup>1</sup>, Brian K. Northup <sup>2</sup>, and Daniel N. Moriasi<sup>2</sup>

<sup>1</sup> United States Department of Agricultural Research Service (USDA-ARS), Sustainable Water Management Research Unit, Leland, MS 38756, USA; [amanda.nelson@usda.gov](mailto:amanda.nelson@usda.gov); [mahesh.maskey@usda.gov](mailto:mahesh.maskey@usda.gov)

<sup>2</sup> United States Department of Agricultural Research Service (USDA-ARS), Oklahoma and Central Plains Agricultural Research Center, El Reno, OK 73036, USA [brian.northup@usda.gov](mailto:brian.northup@usda.gov); [daniel.moriasi@usda.gov](mailto:daniel.moriasi@usda.gov)

\* Correspondence: [amanda.nelson@usda.gov](mailto:amanda.nelson@usda.gov); Tel.: +1-662-686-3178

## Supplementary Materials

Table S1. Planting schedule for watersheds 1 and 8 including plant populations (plants/m<sup>2</sup>), as reported in Nelson et al. [1,2]

Table S2. Fertilizer application schedule for watersheds 1 and 8, including species and applicate rates (kg/ha) as reported in Nelson et al. [1,2]

Table S3. Pesticides application schedule for watersheds 1 and 8, including species and applicate rates (kg/ha), as reported in Nelson et al. [1,2]

Table S4. Grazing schedule watersheds 1 and 8, as reported in Nelson et al. [1,2]

Table S5. APEX crop database for the crops in WRE [3,4]

Table S6. Fertilizers applied in WRE watersheds during the monitoring period and implied characteristics in the APEX database [3,4]

Table S7. Pesticides applied in WRE watersheds during the monitoring period and implied characteristics in the APEX database [3,4]

Table S8. Grazer characteristics for the WRE watersheds during the monitoring period and implied characteristics in the APEX database [3–5]

Table S9. Calibrated APEX parameters for native prairie (WRE1) and cropland (WRE8) for surface runoff, implied by maximum NSE and COD and absolute PBIAS. Refer to Table 2 for the definition of parameters.

Table S10. Annual average of selected response variables, including environmental indicators in grassland (WRE1), implied by the calibrated parameter set and respective changes in % with respect to grazing operations during calibration (1983–1995) and validation (1996–2000) periods, implied by four different best metrics. Values in gray-shaded cells refer to decreased response variables after grazing.

Table S11. Annual average of selected response variables, including environmental indicators in cropland (WRE8), implied by calibrated parameter set and respective changes in % with respect to grazing operations during calibration (1982–1994) and validation (1995–2000) periods, implied by four different best metrics. Values in gray-shaded cells refer to decreased response variables after grazing.

**Citation:** To be added by editorial staff during production.

Academic Editor: Firstname Last-name

Received: date

Revised: date

Accepted: date

Published: date

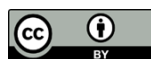

**Copyright:** © 2024 by the authors.

Submitted for possible open access publication under the terms and conditions of the Creative Commons Attribution (CC BY) license (<https://creativecommons.org/licenses/by/4.0/>).

**Table S1.** Planting schedule for watersheds 1 and 8 including plant populations (plants/m<sup>2</sup>) as reported in Nelson et al. [1,2]

| Watershed | Planting Date | Crop         | Plant population<br>(plants/m <sup>2</sup> ) |
|-----------|---------------|--------------|----------------------------------------------|
| WRE1      | 1/1/1979      | Pasture      | 3000                                         |
|           | Total         |              | 3000                                         |
| WRE8      | 9/11/1978     | Winter wheat | 210.97                                       |
|           | 10/3/1979     | Winter wheat | 316.91                                       |
|           | 3/10/1980     | Winter wheat | 316.91                                       |
|           | 4/12/1981     | Winter wheat | 316.91                                       |
|           | 10/6/1982     | Winter wheat | 316.91                                       |
|           | 3/2/1983      | Oats         | 714.00                                       |
|           | 11/17/1983    | Winter wheat | 316.91                                       |
|           | 10/23/1984    | Winter wheat | 316.91                                       |
|           | 12/23/1985    | Winter wheat | 422.55                                       |
|           | 10/31/1986    | Winter wheat | 316.91                                       |
|           | 10/9/1987     | Winter wheat | 316.91                                       |
|           | 10/26/1988    | Winter wheat | 316.91                                       |
|           | 9/29/1989     | Winter wheat | 316.91                                       |
|           | 10/5/1990     | Winter wheat | 316.91                                       |
|           | 10/2/1992     | Winter wheat | 316.91                                       |
|           | 10/12/1993    | Winter wheat | 422.55                                       |
|           | 10/11/1994    | Winter wheat | 422.55                                       |
|           | 10/24/1995    | Winter wheat | 422.55                                       |
|           | 12/16/1996    | Winter wheat | 422.55                                       |
|           | 9/19/1997     | Winter wheat | 422.55                                       |
|           | 9/4/1998      | Winter wheat | 422.55                                       |
|           | 10/11/1999    | Winter wheat | 316.91                                       |
|           | Total         |              | 7288.68                                      |

40  
41

42

43

**Table S2.** Fertilizer application schedule for watersheds 1 and 8, including species and application rates (kg/ha) as reported in Nelson et al. [1,2]

| Watershed | Fertilizer brand | Date of Application | Rate of Application (kg/ha) |
|-----------|------------------|---------------------|-----------------------------|
| WRE1      | 33.5-00-00       | 3/31/1980           | 145.71                      |
|           | 12-50-00         | 3/31/1980           | 56.04                       |
|           | 34-00-00         | 5/7/1982            | 168.13                      |
|           | 34-00-00         | 4/26/1983           | 168.13                      |
|           | 33-00-00         | 5/30/1985           | 168.13                      |
|           | Total            |                     | 706.14                      |
| WRE8      | 34-00-00         | 1/1/1978            | 244.79                      |
|           | 00-46-00         | 10/24/1978          | 81.60                       |
|           | 34-00-00         | 10/24/1978          | 244.79                      |
|           | 16-20-06         | 9/12/1979           | 336.26                      |
|           | 34-00-00         | 9/25/1980           | 224.17                      |
|           | 18-46-00         | 9/15/1981           | 112.09                      |
|           | 34-00-00         | 9/15/1981           | 112.09                      |
|           | 34-00-00         | 3/9/1982            | 224.17                      |
|           | 18-46-00         | 9/17/1982           | 112.09                      |
|           | 34-00-00         | 9/17/1982           | 112.09                      |
|           | 34-00-00         | 11/15/1982          | 224.17                      |
|           | 34-00-00         | 5/1/1983            | 112.09                      |
|           | 34-00-00         | 3/22/1984           | 112.09                      |
|           | 18-46-00         | 9/1/1984            | 112.09                      |
|           | 34-00-00         | 3/19/1985           | 224.17                      |
|           | 34-00-00         | 11/22/1985          | 112.09                      |
|           | 10-20-10         | 11/22/1985          | 112.09                      |
|           | 46-00-00         | 10/17/1986          | 112.09                      |
|           | 46-00-00         | 3/6/1987            | 84.06                       |
|           | 18-46-00         | 10/18/1988          | 112.09                      |
|           | 46-00-00         | 3/14/1989           | 168.13                      |
|           | 46-00-00         | 9/26/1989           | 140.11                      |
|           | 18-46-00         | 9/26/1989           | 112.09                      |
|           | 46-00-00         | 9/14/1990           | 140.11                      |
|           | 46-00-00         | 2/28/1991           | 112.09                      |
|           | 10-20-10         | 9/27/1991           | 112.09                      |
|           | 46-00-00         | 3/10/1992           | 112.09                      |
|           | 46-00-00         | 3/10/1993           | 112.09                      |
|           | 18-46-00         | 10/5/1993           | 112.09                      |
|           | 46-00-00         | 10/5/1993           | 112.09                      |
|           | 46-00-00         | 3/18/1994           | 112.09                      |
|           | 46-00-00         | 3/10/1995           | 112.09                      |
|           | 46-00-00         | 10/17/1995          | 112.09                      |
|           | Nitrogen         | 3/19/1997           | 34.75                       |
|           | Nitrogen         | 3/11/1999           | 34.75                       |
|           | Urea             | 10/28/1999          | 51.56                       |
|           | Total            |                     | 4811.36                     |

44  
45

**Table S3.** Pesticides application schedule for watersheds 1 and 8, including species and application rates (kg/ha), as reported in Nelson et al. [1,2]

| Watershed | Pesticide brand   | Date of application | Rate of application (kg/ha) |
|-----------|-------------------|---------------------|-----------------------------|
| WRE1      | Grazon            | 5/29/1985           | 0.58                        |
|           | Grazon            | 5/19/1999           | 1.17                        |
|           | 2-4D              | 5/19/1999           | 1.17                        |
|           | Total             |                     | 2.91                        |
| WRE8      | Glean             | 3/22/1985           | 0.19                        |
|           | MCP (2-4D MCPA)   | 4/16/1985           | 1.68                        |
|           | Landmaster        | 6/18/1987           | 2.93                        |
|           | Ammonium Sulphate | 6/18/1987           | 19.05                       |
|           | Activator         | 6/18/1987           | 2.34                        |
|           | MCPA              | 4/11/1988           | 0.84                        |
|           | Landmaster BW     | 7/18/1989           | 3.78                        |
|           | Glean             | 2/24/1990           | 0.02                        |
|           | Salvo (2-4D)      | 2/24/1990           | 0.28                        |
|           | Glean             | 2/15/1990           | 0.02                        |
|           | Salvo (2-4D)      | 2/15/1990           | 0.22                        |
|           | Landmaster BW     | 7/27/1995           | 3.78                        |
|           | Dimethaoter       | 3/19/1997           | 0.90                        |
|           | Finnesse          | 3/19/1997           | 0.01                        |
|           | 2-4D              | 3/19/1997           | 0.01                        |
|           | Roundup Ultra     | 5/13/1999           | 1.12                        |
|           | Weeder 64 (2-4D)  | 5/13/1999           | 1.12                        |
|           | Roundup           | 5/13/1999           | 0.28                        |
|           | Roundup           | 6/29/1999           | 0.28                        |
|           | Roundup Ultra     | 8/8/1999            | 1.68                        |
|           | Total             |                     | 40.56                       |

**Table S4.** Grazing schedule watersheds 1 and 8, as reported in Nelson et al. [1,2]

51

| Watershed | Animal species | Numbers of cattle | Grazing schedule |            |      |
|-----------|----------------|-------------------|------------------|------------|------|
|           |                |                   | Start date       | Stop date  | Days |
| WRE1      | Calves         | 16                | 2/26/1979        | 3/30/1979  | 33   |
|           | Calves         | 6                 | 6/25/1981        | 7/21/1981  | 27   |
|           | Calves         | 6                 | 8/18/1981        | 9/16/1981  | 30   |
|           | Cows           | 10                | 7/31/1984        | 9/17/1984  | 49   |
|           | Calves         | 6                 | 6/15/1986        | 7/9/1986   | 25   |
|           | Mature cows    | 8                 | 7/13/1987        | 9/21/1987  | 71   |
|           | Mature cows    | 8                 | 6/13/1988        | 7/7/1988   | 25   |
|           | Mature cows    | 8                 | 6/8/1989         | 8/4/1989   | 58   |
|           | Mature cows    | 8                 | 8/24/1989        | 9/11/1989  | 19   |
|           | Mature cows    | 8                 | 6/4/1990         | 7/9/1990   | 36   |
|           | Mature cows    | 8                 | 9/24/1990        | 10/1/1990  | 8    |
|           | Mature cows    | 8                 | 6/4/1991         | 7/9/1991   | 36   |
|           | Mature cows    | 8                 | 6/15/1992        | 7/6/1992   | 22   |
|           | Mature cows    | 9                 | 10/1/1992        | 11/20/1992 | 51   |
|           | Stockers       | 16                | 8/15/1997        | 9/2/1997   | 19   |
|           | Stockers       | 16                | 7/7/1998         | 7/13/1998  | 7    |
|           | Stockers       | 4                 | 6/11/1999        | 9/22/1999  | 104  |
|           | Total          | 153               |                  |            | 620  |
| WRE8      | Calves         | 4                 | 12/15/1978       | 2/16/1979  | 64   |
|           | Bulls          | 4                 | 4/1/1979         | 4/15/1979  | 15   |
|           | Yearlings      | 4                 | 5/20/1979        | 6/3/1979   | 15   |
|           | Heifers        | 15                | 5/8/1983         | 6/6/1983   | 30   |
|           | Calves         | 12                | 9/8/1987         | 9/29/1987  | 22   |
|           | Stockers       | 49                | 5/12/1998        | 5/21/1998  | 10   |
|           | Stockers       | 2                 | 12/1/1998        | 4/21/1999  | 142  |
|           | Stockers       | 4                 | 12/3/1998        | 4/21/1999  | 140  |
|           | Stockers       | 6                 | 3/11/1999        | 4/21/1999  | 42   |
|           | Total          | 100               |                  |            | 480  |

52

Table S5. APEX crop database for the crops in WRE [3,4]

53

| Crop characteristics                                               | Crops   |                 |         |
|--------------------------------------------------------------------|---------|-----------------|---------|
| Crop number used in APEX database                                  | 187     | 10              | 16      |
| Unit planted in                                                    | WRE1    | WRE8            | WRE8    |
| Acronym of crop                                                    | PAST    | WWHT            | OATS    |
| Full name of crop                                                  | PASTURE | WINTER<br>WHEAT | OATS    |
| Biomass-Energy Ratio (CO <sub>2</sub> =330ppm)                     | 35.000  | 35.000          | 35.000  |
| Harvest Index                                                      | 0.020   | 0.450           | 0.420   |
| Optimal temperature for plant growth                               | 25.000  | 15.000          | 15.000  |
| Minimum temperature for plant growth                               | 8.000   | 0.000           | 0.000   |
| Maximum potential leaf area index                                  | 5.000   | 6.000           | 6.000   |
| Fraction of growing season when leaf area declines                 | 0.990   | 0.600           | 0.800   |
| First point on optimal leaf area development curve                 | 15.010  | 15.010          | 15.010  |
| Second point on optimal leaf area development curve                | 50.950  | 50.950          | 50.950  |
| Leaf area index decline rate parameter                             | 1.000   | 1.000           | 1.000   |
| Biomass-energy ratio decline rate parameter                        | 1.000   | 1.000           | 1.000   |
| Aluminum tolerance index                                           | 2.000   | 2.000           | 2.000   |
| Maximum Stomatal Conductance                                       | 0.007   | 0.007           | 0.007   |
| Critical aeration factor                                           | 0.850   | 0.850           | 0.850   |
| Seeding rate                                                       | 5.000   | 90.000          | 90.000  |
| Maximum crop height                                                | 1.000   | 1.000           | 1.000   |
| Maximum root depth                                                 | 2.000   | 2.000           | 2.000   |
| CO <sub>2</sub> Concentration /Resulting WA value (Split Variable) | 660.400 | 660.470         | 660.470 |
| Fraction of nitrogen in yield                                      | 0.015   | 0.025           | 0.032   |
| Fraction of phosphorus in yield                                    | 0.002   | 0.003           | 0.006   |
| Fraction of potassium in yield                                     | 0.016   | 0.004           | 0.005   |
| Lower limit of harvest index                                       | 0.010   | 0.210           | 0.210   |
| Pest (insects and disease) factor                                  | 0.600   | 0.600           | 0.600   |
| Seed cost (\$ kg <sup>-1</sup> )                                   | 0.690   | 0.260           | 0.030   |
| Price for yield (\$t <sup>-1</sup> )                               | 20.000  | 153.620         | 124.030 |
| Price for forage yield (\$ t <sup>-1</sup> )                       | 5.000   | 20.000          | 20.000  |
| Fraction water in yield                                            | 0.100   | 0.120           | 0.100   |
| Nitrogen uptake parameter (N fraction in plant at emergence)       | 0.022   | 0.060           | 0.058   |
| Nitrogen uptake parameter (N fraction in plant at 05 maturity)     | 0.013   | 0.023           | 0.022   |
| Nitrogen uptake parameter (N fraction in plant at maturity)        | 0.010   | 0.013           | 0.013   |
| Phosphorus uptake parameter (P fraction in plant at emergence)     | 0.004   | 0.008           | 0.005   |
| Phosphorus uptake parameter (P fraction in plant at 05 maturity)   | 0.002   | 0.003           | 0.002   |
| Phosphorus uptake parameter (P fraction in plant at maturity)      | 0.002   | 0.002           | 0.001   |
| Potassium uptake parameter (K fraction in plant at emergence)      | 0.028   | 0.023           | 0.028   |
| Potassium uptake parameter (K fraction in plant at05 maturity)     | 0.016   | 0.020           | 0.020   |
| Potassium uptake parameter (K fraction in plant at maturity)       | 0.012   | 0.017           | 0.012   |
| Wind erosion factor for standing live                              | 3.390   | 3.390           | 3.390   |
| Wind erosion factor for standing dead                              | 3.390   | 3.390           | 3.390   |
| Wind erosion factor for flat residue                               | 3.390   | 1.610           | 1.610   |
| Crop category number                                               | 6       | 5               | 5       |
| First point on frost damage curve                                  | 5.050   | 5.010           | 5.010   |
| Second point on frost damage curve                                 | 15.950  | 15.100          | 15.100  |

| Crop characteristics                                               |         | Crops   |         |
|--------------------------------------------------------------------|---------|---------|---------|
| Parameter relating vapor pressure deficit to WA                    | 7.000   | 6.000   | 7.000   |
| Threshold VPD (KPA)                                                | 0.500   | 0.500   | 0.500   |
| VPD value (KPA)                                                    | 4.750   | 4.750   | 4.750   |
| Fraction of root weight at emergence                               | 0.400   | 0.400   | 0.400   |
| Fraction of root weight at maturity                                | 0.200   | 0.200   | 0.200   |
| Heat Units required for Germination                                | 100.000 | 100.000 | 100.000 |
| Plant Population for Crops & Grass-1st Point on curve              | 22.500  | 125.600 | 125.600 |
| Plant Population for Crops & Grass - 2nd Point on curve            | 40.710  | 250.950 | 250.950 |
| Salinity effects on yield                                          | 0.040   | 0.070   | 0.070   |
| Salinity threshold                                                 | 2.800   | 6.000   | 8.000   |
| Lignin fraction in plant at 05 maturity                            | 0.010   | 0.010   | 0.010   |
| Lignin fraction in plant at full maturity                          | 0.100   | 0.100   | 0.100   |
| Water use conversion to biomass (t/mm)                             | 0.000   | 0.000   | 0.000   |
| Fraction turnout for cotton                                        | 0.000   | 0.000   | 0.000   |
| Fraction lint for cotton                                           | 0.000   | 0.000   | 0.000   |
| Indeterminate crop growth*                                         | 0.000   | 0.000   | 0.000   |
| Root decay as a percentage of the total root (belowground) biomass | 0.002   | 0.002   | 0.002   |
| Light extinction coefficient                                       | 0.000   | 0.000   | 0.000   |

**Table S6.** Fertilizers applied in WRE watersheds during monitoring period and implied character-istics in the APEX database [3,4]

| ID  | FTNM       | FN   | FP   | FK   | FNO  | FPO  | FNH3 | FOC  | FSLT | FCST |
|-----|------------|------|------|------|------|------|------|------|------|------|
| 3   | 00-45-00   | 0.00 | 0.20 | 0.00 | 0.00 | 0.00 | 0.00 | 0.00 | 0.00 | 0.00 |
| 22  | 12-20-00   | 0.12 | 0.09 | 0.00 | 0.00 | 0.00 | 0.00 | 0.00 | 0.00 | 0.00 |
| 22  | 12-50-00   | 0.12 | 0.09 | 0.00 | 0.00 | 0.00 | 0.00 | 0.00 | 0.00 | 0.00 |
| 29  | 16-20-00   | 0.16 | 0.09 | 0.00 | 0.00 | 0.00 | 0.00 | 0.00 | 0.00 | 0.28 |
| 33  | 18-46-00   | 0.18 | 0.20 | 0.00 | 0.00 | 0.00 | 0.00 | 0.00 | 0.00 | 0.27 |
| 60  | 33.5-00-00 | 0.33 | 0.00 | 0.00 | 0.00 | 0.00 | 0.00 | 0.00 | 0.00 | 0.22 |
| 61  | 34-00-00   | 0.34 | 0.00 | 0.00 | 0.00 | 0.00 | 0.00 | 0.00 | 0.00 | 0.29 |
| 66  | 46-00-00   | 0.46 | 0.00 | 0.00 | 0.00 | 0.00 | 0.00 | 0.00 | 0.00 | 0.31 |
| 92  | ELEM-N     | 1.00 | 0.00 | 0.00 | 0.00 | 0.00 | 0.00 | 0.00 | 0.00 | 0.24 |
| 126 | UREA       | 1.00 | 0.00 | 0.00 | 0.00 | 0.00 | 1.00 | 0.00 | 0.00 | 0.00 |
| 129 | 10-20-10   | 0.10 | 0.09 | 0.08 | 0.00 | 0.00 | 0.00 | 0.00 | 0.00 | 0.27 |

|      |                            |    |
|------|----------------------------|----|
| ID   | Fertilizer ID number       | 57 |
| FTNM | Fertilizer name            | 58 |
| FN   | Mineral N fraction         | 59 |
| FP   | Mineral P fraction         | 60 |
| FK   | Mineral K fraction         | 61 |
| FNO  | Organic N fraction         | 62 |
| FPO  | Organic P fraction         | 63 |
| FNH3 | Ammonia N fraction         | 64 |
| FOC  | Organic C fraction         | 65 |
| FSLT | Salt fraction              | 66 |
| FCST | Cost of Fertilizer (\$/kg) | 67 |
|      |                            | 68 |



**Table S7.** Pesticides applied in WRE watersheds during the monitoring period and implied characteristics in the APEX database [3,4]

| ID  | PSTN            | PSOL       | PHLS   | PHLF   | PWOF | PKOC     | PCST |
|-----|-----------------|------------|--------|--------|------|----------|------|
| 1   | 2,4-D           | 1000.00    | 10.00  | 9.00   | 0.40 | 74.00    | 0.00 |
| 120 | Glean           | 7000.00    | 160.00 | 30.00  | 0.80 | 40.00    | 0.00 |
| 204 | Roundup         | 900000.00  | 47.00  | 2.50   | 0.60 | 24000.00 | 0.00 |
| 290 | Landmaster      | 12000.00   | 249.00 | 0.00   | 0.00 | 0.00     | 0.00 |
| 291 | Ammonia Sulfate | 744000.00  | 0.00   | 0.00   | 0.00 | 0.00     | 0.00 |
| 292 | MCPA            | 825.00     | 24.00  | 0.00   | 0.00 | 0.00     | 0.00 |
| 293 | Landmaster BW   | 45000.00   | 249.00 | 0.00   | 0.00 | 0.00     | 0.00 |
| 294 | Grazon P+D      | 900.00     | 513.00 | 40.00  | 0.00 | 0.00     | 0.00 |
| 295 | Salvo           | 45000.00   | 6.20   | 0.00   | 0.00 | 0.00     | 0.00 |
| 296 | Finesse         | 12500.00   | 320.00 | 0.00   | 0.00 | 0.00     | 0.00 |
| 297 | Dimethoate      | 25.00      | 4.00   | 0.00   | 0.00 | 0.00     | 0.00 |
| 299 | Roundup Ultra   | 1010000.00 | 249.00 | 133.00 | 0.00 | 0.00     | 0.00 |
| 300 | Activator       | 2000.00    | 488.00 | 60.00  | 0.00 | 0.00     | 0.00 |

|      |                                                                                                                                                                                                                                      |                |
|------|--------------------------------------------------------------------------------------------------------------------------------------------------------------------------------------------------------------------------------------|----------------|
| ID   | Pesticide ID number                                                                                                                                                                                                                  | 71             |
| PSTN | Pesticide name. Common or brand name of the pesticide. (cols. 7-22)                                                                                                                                                                  | 72             |
| PSOL | Pesticide solubility in ppm. The amount of the pesticide product which can dissolve in water. (ppm) (cols. 23-34)                                                                                                                    | 73<br>74       |
| PHLS | Pesticide half-life in soil in days. The time that it takes for the concentration of pesticide product in the soil to be reduced by half. (days) (cols. 35-42)                                                                       | 75<br>76       |
| PHLF | Pesticide half-life on foliage in days. The time that it takes for the concentration of pesticide products on the foliage to be reduced by half. Degradation occurs through microbial activity and/or sunlight. (days) (cols. 43-50) | 77<br>78<br>79 |
| PWOF | Fraction of pesticides washed off. Percentage of the pesticide product that is applied to foliage that is washed off into the soil. (%) (cols. 51-58)                                                                                | 80<br>81       |
| PKOC | Absorption coefficient for organic C in pesticides. Amount of pesticide products attached to the soil divided by the amount of the pesticide product in solution, normalized by organic carbon % in the soil. (cols. 59-68)          | 82<br>83<br>84 |
| PCST | Pesticide cost in \$/KG. Used for economic analyses only. (cols. 69-76)                                                                                                                                                              | 85<br>86       |

**Table S8.** Grazer characteristics for the WRE watersheds during monitoring period and implied characteristics in the APEX database [3–5]

| Number         | 1      | 2     | 3        | 4       | 5      | 6         | 7       |
|----------------|--------|-------|----------|---------|--------|-----------|---------|
| Animal species | Calves | Cow   | Cow-calf | Stocker | Bulls  | Yearlings | Heifers |
| PTHP           | 0.15   | 0.15  | 0.15     | 0.15    | 0.15   | 0.15      | 0.15    |
| PTHD           | 0.4    | 0.4   | 0.4      | 0.4     | 0.4    | 0.4       | 0.4     |
| PTHU           | 0.95   | 0.95  | 0.95     | 0.95    | 0.95   | 0.95      | 0.95    |
| GZLMt/ha       | 1.11   | 0.46  | 0.63     | 2.40    | 1.24   | 1.07      | 5.31    |
| GZIN           | 0.026  | 0.026 | 0.026    | 0.008   | 0.020  | 0.026     | 0.030   |
| GZWkg/hd       | 130.0  | 454.0 | 454.0    | 227.0   | 500.0  | 130.0     | 272.0   |
| GZWMkg/hd      | 454.0  | 454.0 | 454.0    | 408.0   | 1000.0 | 354.0     | 635.0   |
| PMLKkg/hd      | 0.0    | 9.0   | 9.0      | 0.0     | 0.0    | 0.0       | 27.3    |
| ANTQ           | 0.0    | 0.0   | 0.0      | 0.0     | 0.0    | 0.0       | 0.0     |
| IGZD           | 2      | 4     | 4        | 7       | 4      | 3         | 7       |
| IMPL           | 0      | 0     | 0        | 0       | 0      | 1         | 0       |
| ICVB           | 0      | 60    | 60       | 60      | 60     | 0         | 82      |
| ICVF           | 0      | 90    | 90       | 90      | 90     | 0         | 365     |
| ICWD           | 50     | 315   | 315      | 240     | 99     | 50        | 180     |

PTHP Preferred forage threshold

PTHD Desirable forage threshold

PTHU Undesirable forage threshold

GZLMt/ha Grazing limit(t/ha)

GZIN Grazer intake rate fraction of GZWT

GZWkg/hd Initial weight of grazer (kg/hd)

GZWMkg/hd Mature weight of grazer (kg/hd)

PMLKkg/hd Peak production of milk (kg/hd)

ANTQ Tolerance factor for anti-quality factors of forage

IGZD Grazing intake

IMPL Anabolic implant

ICVB Beginning day of year of calving

ICVF Final day of year of calving

ICWD Weaning day of year

**Table S9.** Calibrated APEX parameters for native prairie (WRE1) and cropland (WRE8) for surface runoff, implied by maximum NSE and COD and absolute PBIAS. Refer to Table 2 for the definition of parameters.

| Parameters | WRE1: Native prairie |        |         |        |         |        | WRE8: Cropland |        |         |        |         |        |
|------------|----------------------|--------|---------|--------|---------|--------|----------------|--------|---------|--------|---------|--------|
|            | NSE                  |        | COD     |        | PBIAS   |        | NSE            |        | COD     |        | PBIAS   |        |
|            | Without              | With   | Without | With   | Without | With   | Without        | With   | Without | With   | Without | With   |
| PARAM [2]  | 1.613                | 1.860  | 1.940   | 1.860  | 1.299   | 1.848  | 1.589          | 1.589  | 1.520   | 1.520  | 1.425   | 1.425  |
| PARAM [4]  | 0.283                | 0.796  | 0.915   | 0.796  | 0.327   | 0.505  | 0.814          | 0.814  | 0.584   | 0.584  | 0.724   | 0.724  |
| PARAM [7]  | 0.074                | 0.045  | 0.052   | 0.045  | 0.411   | 0.458  | 0.934          | 0.934  | 0.453   | 0.453  | 0.520   | 0.520  |
| PARAM [8]  | 18.950               | 11.720 | 16.130  | 11.720 | 17.890  | 14.010 | 12.570         | 12.570 | 16.140  | 16.140 | 18.350  | 18.350 |
| PARAM [14] | 0.694                | 0.454  | 0.121   | 0.454  | 0.335   | 0.819  | 0.113          | 0.113  | 0.331   | 0.331  | 0.699   | 0.699  |
| PARAM [15] | 0.080                | 0.083  | 0.105   | 0.083  | 0.085   | 0.146  | 0.005          | 0.005  | 0.038   | 0.038  | 0.069   | 0.069  |
| PARAM [17] | 0.331                | 0.471  | 0.355   | 0.471  | 0.130   | 0.071  | 0.008          | 0.008  | 0.012   | 0.012  | 0.002   | 0.002  |
| PARAM [18] | 1.076                | 1.277  | 1.050   | 1.277  | 1.325   | 1.138  | 1.361          | 1.361  | 1.345   | 1.345  | 1.303   | 1.303  |
| PARAM [19] | 0.072                | 0.091  | 0.073   | 0.091  | 0.049   | 0.078  | 0.082          | 0.082  | 0.002   | 0.002  | 0.036   | 0.036  |
| PARAM [20] | 0.396                | 0.380  | 0.372   | 0.380  | 0.400   | 0.342  | 0.384          | 0.384  | 0.372   | 0.372  | 0.391   | 0.391  |
| PARAM [23] | 0.0030               | 0.0030 | 0.0026  | 0.0030 | 0.0028  | 0.0028 | 0.0029         | 0.0029 | 0.0029  | 0.0029 | 0.0029  | 0.0029 |
| PARAM [34] | 0.594                | 0.562  | 0.583   | 0.562  | 0.536   | 0.520  | 0.590          | 0.590  | 0.597   | 0.597  | 0.597   | 0.597  |
| PARAM [42] | 2.086                | 2.113  | 1.081   | 2.113  | 2.447   | 0.975  | 0.419          | 0.419  | 1.620   | 1.620  | 0.828   | 0.828  |
| PARAM [45] | 8.176                | 0.652  | 1.099   | 0.652  | 0.833   | 4.367  | 2.828          | 2.828  | 1.916   | 1.916  | 4.509   | 4.509  |
| PARAM [50] | 0.473                | 0.478  | 0.392   | 0.478  | 0.403   | 0.382  | 0.308          | 0.308  | 0.371   | 0.371  | 0.326   | 0.326  |
| PARAM [65] | 0.004                | 0.049  | 0.064   | 0.049  | 0.022   | 0.062  | 0.093          | 0.093  | 0.010   | 0.010  | 0.086   | 0.086  |
| PARAM [66] | 3.709                | 5.914  | 8.245   | 5.914  | 9.532   | 2.647  | 6.526          | 6.526  | 4.150   | 4.150  | 2.152   | 2.152  |
| PARAM [69] | 0.269                | 0.850  | 0.992   | 0.850  | 0.298   | 0.761  | 0.559          | 0.559  | 0.488   | 0.488  | 0.887   | 0.887  |
| PARAM [70] | 1.251                | 0.814  | 0.857   | 0.814  | 1.001   | 0.766  | 0.727          | 0.727  | 0.613   | 0.613  | 0.871   | 0.871  |
| PARAM [72] | 0.190                | 0.098  | 0.111   | 0.098  | 0.400   | 0.073  | 0.352          | 0.352  | 0.070   | 0.070  | 0.329   | 0.329  |

103

104

105

106

**Table S10.** Annual average of selected response variables, including environmental indicators in grassland (WRE1), implied by the calibrated parameter set and respective changes in % with respect to grazing operations during calibration (1983-1995) and validation (1996-2000) periods, implied by four different best metrics. Values in gray-shaded cells refer to decreased response variables after grazing.

| Response variables                | OF          |         |            |         | NSE         |         |            |         | COD         |         |            |         | PBIAS       |         |            |         |
|-----------------------------------|-------------|---------|------------|---------|-------------|---------|------------|---------|-------------|---------|------------|---------|-------------|---------|------------|---------|
|                                   | Calibration |         | Validation |         | Calibration |         | Validation |         | Calibration |         | Validation |         | Calibration |         | Validation |         |
|                                   | Without     | With    | Without    | With    |
| Precipitation, mm                 | 1009        |         | 890        |         | 1009        |         | 890        |         | 1009        |         | 890        |         | 1009        |         | 890        |         |
| Water yield, mm                   | 146.67      | 146.72  | 98.43      | 75.41   | 149.12      | 159.09  | 92.61      | 101.84  | 155.49      | 159.09  | 103.97     | 101.84  | 146.67      | 146.68  | 98.43      | 98.39   |
| Deep percolation, mm              | 36.63       | 30.59   | 22.94      | 14.28   | 31.78       | 30.86   | 21.12      | 20.06   | 26.32       | 30.86   | 18.67      | 20.06   | 36.63       | 18.09   | 22.94      | 3.38    |
| Sediment, t/ha                    | 2.29        | 0.45    | 2.03       | 1.39    | 1.86        | 0.57    | 1.88       | 3.34    | 3.36        | 0.57    | 3.02       | 3.34    | 2.29        | 0.76    | 2.03       | 4.54    |
| Soil erosion, t/ha                | 2.29        | 0.46    | 2.03       | 1.40    | 1.86        | 0.57    | 1.87       | 3.34    | 3.36        | 0.57    | 3.03       | 3.34    | 2.29        | 0.76    | 2.03       | 4.54    |
| Evapotranspiration, mm            | 820.63      | 827.98  | 775.81     | 818.92  | 824.03      | 814.49  | 795.37     | 788.29  | 823.97      | 814.49  | 785.01     | 788.29  | 820.63      | 840.68  | 775.81     | 805.71  |
| Potential ET, mm                  | 1514.60     | 1661.15 | 1457.21    | 1596.03 | 1765.19     | 1622.15 | 1694.49    | 1559.10 | 1714.63     | 1622.15 | 1646.65    | 1559.10 | 1514.60     | 1452.04 | 1457.21    | 1397.90 |
| Total phosphorus, kg/ha           | 0.37        | 0.08    | 0.05       | 0.25    | 0.27        | 0.16    | 0.07       | 0.53    | 0.38        | 0.16    | 0.04       | 0.53    | 0.37        | 0.17    | 0.05       | 0.64    |
| Total nitrogen, kg/ha             | 5.74        | 2.43    | 4.05       | 4.15    | 5.33        | 2.73    | 4.13       | 7.86    | 6.93        | 2.73    | 4.72       | 7.86    | 5.74        | 3.85    | 4.05       | 11.21   |
| Plant biomass, t/ha               | 15.53       | 28.78   | 8.52       | 20.84   | 17.65       | 20.47   | 9.68       | 12.53   | 12.69       | 20.47   | 6.97       | 12.53   | 15.53       | 19.86   | 8.52       | 9.17    |
| Forage yield, t/ha                | 11.25       | 2.54    | 5.51       | 4.54    | 13.09       | 1.58    | 6.19       | 2.27    | 9.34        | 1.58    | 4.06       | 2.27    | 11.25       | 1.48    | 5.51       | 1.59    |
| Standing dead crop residue, t/ha  | 6.23        | 24.00   | 5.46       | 16.35   | 8.51        | 17.49   | 6.63       | 9.88    | 6.37        | 17.49   | 5.15       | 9.88    | 6.23        | 16.90   | 5.46       | 7.41    |
| Standing live plant biomass, t/ha | 0.25        | 1.46    | 0.34       | 1.10    | 0.37        | 1.02    | 0.43       | 0.67    | 0.23        | 1.02    | 0.32       | 0.67    | 0.25        | 0.97    | 0.34       | 0.51    |
| Drought stress, d                 | 4.22        | 36.39   | 9.97       | 43.27   | 21.94       | 24.62   | 22.84      | 30.66   | 15.86       | 24.62   | 17.45      | 30.66   | 4.22        | 22.43   | 9.97       | 25.66   |
| Temperature stress, d             | 139.37      | 138.95  | 133.71     | 141.18  | 142.21      | 134.71  | 135.38     | 137.21  | 138.32      | 134.71  | 131.31     | 137.21  | 139.37      | 134.11  | 133.71     | 132.64  |
| Nitrogen stress, d                | 76.22       | 0.00    | 78.27      | 4.29    | 23.59       | 32.90   | 24.76      | 0.00    | 0.31        | 32.90   | 0.00       | 0.00    | 76.22       | 34.77   | 78.27      | 0.00    |
| Phosphorus stress, d              | 65.99       | 104.71  | 84.38      | 88.05   | 90.94       | 101.49  | 120.26     | 129.88  | 140.47      | 101.49  | 166.19     | 129.88  | 65.99       | 103.71  | 84.38      | 150.81  |

**Table S11.** Annual average of selected response variables, including environmental indicators in cropland (WRE8), implied by calibrated parameter set and respective changes in % with respect to grazing operations during calibration (1982-1994) and validation (1995-2000) periods, implied by four different best metrics. Values in gray-shaded cells refer to decreased response variables after grazing.

| Response variables                | OF          |         |            |         | NSE         |         |            |         | COD         |         |            |         | PBIAS       |         |            |         |
|-----------------------------------|-------------|---------|------------|---------|-------------|---------|------------|---------|-------------|---------|------------|---------|-------------|---------|------------|---------|
|                                   | Calibration |         | Validation |         | Calibration |         | Validation |         | Calibration |         | Validation |         | Calibration |         | Validation |         |
|                                   | Without     | With    | Without    | With    |
| Precipitation, mm                 | 1289        |         | 896        |         | 1289        |         | 896        |         | 1289        |         | 896        |         | 1289        |         | 896        |         |
| Water yield, mm                   | 160.99      | 160.91  | 110.34     | 109.07  | 163.30      | 163.24  | 113.25     | 113.22  | 163.46      | 163.45  | 111.88     | 112.20  | 160.99      | 160.91  | 110.34     | 109.07  |
| Deep percolation, mm              | 44.73       | 44.69   | 32.62      | 33.13   | 52.24       | 52.22   | 41.51      | 42.69   | 45.30       | 45.31   | 34.29      | 33.90   | 44.73       | 44.69   | 32.62      | 33.13   |
| Sediment, t/ha                    | 8.06        | 7.47    | 2.26       | 1.60    | 17.87       | 17.92   | 9.67       | 9.44    | 13.01       | 13.12   | 6.09       | 6.86    | 8.06        | 7.47    | 2.26       | 1.60    |
| Soil erosion, t/ha                | 8.06        | 7.47    | 2.26       | 1.60    | 17.87       | 17.92   | 9.67       | 9.44    | 13.01       | 13.12   | 6.09       | 6.86    | 8.06        | 7.47    | 2.26       | 1.60    |
| Evapotranspiration, mm            | 1058.08     | 1058.18 | 763.76     | 764.20  | 1046.17     | 1046.24 | 749.76     | 748.67  | 1056.72     | 1056.69 | 759.36     | 759.69  | 1058.08     | 1058.18 | 763.76     | 764.20  |
| Potential ET, mm                  | 2225.94     | 2225.94 | 1721.51    | 1721.51 | 2184.97     | 2184.97 | 1690.36    | 1690.36 | 2225.94     | 2225.94 | 1721.51    | 1721.51 | 2225.94     | 2225.94 | 1721.51    | 1721.51 |
| Total phosphorus, kg/ha           | 2.84        | 2.75    | 0.64       | 0.38    | 5.56        | 5.64    | 2.66       | 2.60    | 4.46        | 4.55    | 1.99       | 2.17    | 2.84        | 2.75    | 0.64       | 0.38    |
| Total nitrogen, kg/ha             | 16.98       | 16.15   | 3.37       | 2.71    | 19.51       | 19.86   | 8.20       | 8.04    | 20.61       | 21.09   | 6.83       | 7.43    | 16.98       | 16.15   | 3.37       | 2.71    |
| Crop biomass, t/ha                | 20.05       | 20.13   | 17.75      | 17.94   | 19.46       | 19.56   | 17.19      | 17.36   | 21.90       | 21.97   | 19.04      | 19.36   | 20.05       | 20.13   | 17.75      | 17.94   |
| Crop yield, t/ha                  | 4.88        | 4.89    | 3.30       | 3.61    | 4.23        | 4.24    | 3.06       | 3.25    | 5.18        | 5.19    | 3.58       | 4.00    | 4.88        | 4.89    | 3.30       | 3.61    |
| Standing dead crop residue, t/ha  | 13.89       | 13.94   | 12.67      | 12.67   | 13.56       | 13.63   | 12.21      | 12.19   | 15.14       | 15.17   | 13.72      | 13.85   | 13.89       | 13.94   | 12.67      | 12.67   |
| Standing live plant biomass, t/ha | 1.30        | 1.30    | 1.21       | 1.21    | 1.27        | 1.27    | 1.16       | 1.16    | 1.41        | 1.42    | 1.30       | 1.32    | 1.30        | 1.30    | 1.21       | 1.21    |
| Drought stress, d                 | 4.88        | 4.89    | 3.30       | 3.61    | 4.23        | 4.24    | 3.06       | 3.25    | 5.18        | 5.19    | 3.58       | 4.00    | 4.88        | 4.89    | 3.30       | 3.61    |
| Temperature stress, d             | 65.48       | 65.63   | 47.20      | 47.27   | 64.11       | 64.25   | 46.09      | 45.78   | 69.55       | 69.58   | 50.63      | 51.13   | 65.48       | 65.63   | 47.20      | 47.27   |
| Nitrogen stress, d                | 13.62       | 13.17   | 26.14      | 26.89   | 17.96       | 17.40   | 30.57      | 31.46   | 1.70        | 1.51    | 0.04       | 0.03    | 13.62       | 13.17   | 26.14      | 26.89   |
| Phosphorus stress, d              | 0.00        | 0.00    | 0.00       | 0.00    | 0.00        | 0.00    | 0.00       | 0.00    | 0.00        | 0.00    | 15.27      | 14.54   | 0.00        | 0.00    | 0.00       | 0.00    |

## References

1. Nelson, A.M.; Moriasi, D.N.; Fortuna, A.; Steiner, J.L.; Starks, P.J.; Northup, B.; Garbrecht, J. Data from: Runoff Water Quantity and Quality Data from Native Tallgrass Prairie and Crop-Livestock Systems in Oklahoma between 1977 and 1999. *J. Environ. Qual.* **2020**, *49*, 1062–1072, doi:doi.org/10.15482/USDA.ADC/1518421.
2. Nelson, A.M.; Moriasi, D.N.; Fortuna, A.; Steiner, J.L.; Starks, P.J.; Northup, B.; Garbrecht, J. Runoff Water Quantity and Quality Data from Native Tallgrass Prairie and Crop–Livestock Systems in Oklahoma between 1977 and 1999. *J. Environ. Qual.* **2019**, *49*, 1062–1072.
3. Steglich, E.; Williams, J. *Agricultural Policy/Environmental eXtender Model User’s Manual: Version 0806*; Blackland Research and Extension Center, 2013;
4. Osorio, J.; Zilverberg, C.; Steglich, E.; Williams, J.R. *Agricultural Policy/Environmental eXtender Model User’s Manual: Version APEXgraze Rel.1811*; Blackland Research and Extension Center, 2018;
5. Zilverberg, C.J.; Williams, J.; Jones, C.; Harmony, K.; Angerer, J.; Metz, L.J.; Fox, W. Process-Based Simulation of Prairie Growth. *Ecological Modelling* **2017**, *351*, 24–35.

**Disclaimer/Publisher’s Note:** The statements, opinions and data contained in all publications are solely those of the individual author(s) and contributor(s) and not of MDPI and/or the editor(s). MDPI and/or the editor(s) disclaim responsibility for any injury to people or property resulting from any ideas, methods, instructions or products referred to in the content.
